# Supplementary material for: Biomimetic electrodynamic nanoparticles comprising ginger-derived extracellular vesicles for synergistic anti-infective therapy
Source: Nat Commun. 2022 Nov 22;13:7164. doi: 10.1038/s41467-022-34883-5 (PMC9684156; doi:10.1038/s41467-022-34883-5)
Supplement: Supplementary file 1 — Supplementary Information [file 41467_2022_34883_MOESM1_ESM.pdf]

# Supplementary Information

## **Biomimetic electrodynamic nanoparticles comprising ginger-derived extracellular vesicles for synergistic anti-infective therapy**

Zhuangzhuang Qiao,<sup>1,2,3,5</sup> Kai Zhang,<sup>1,2,3,5</sup> Jin Liu,<sup>4</sup> Daojian Cheng<sup>4</sup>, Bingran Yu,<sup>1,2,3</sup>

Nana Zhao,<sup>1,2,3\*</sup> & Fu-Jian Xu<sup>1,2,3\*</sup>

<sup>1</sup>State Key Laboratory of Chemical Resource Engineering, Beijing University of Chemical Technology, Beijing 100029, China

<sup>2</sup>Key Laboratory of Biomedical Materials of Natural Macromolecules (Beijing University of Chemical Technology), Ministry of Education, Beijing 100029, China

<sup>3</sup>Beijing Laboratory of Biomedical Materials, Beijing University of Chemical Technology, Beijing, 100029, China

<sup>4</sup>State Key Laboratory of Organic-Inorganic Composites, Beijing University of Chemical Technology, Beijing 100029, China

<sup>5</sup>These authors contributed equally: Zhuangzhuang Qiao, Kai Zhang.

\* To whom correspondence should be addressed

Email: xufj@mail.buct.edu.cn, zhaonn@mail.buct.edu.cn

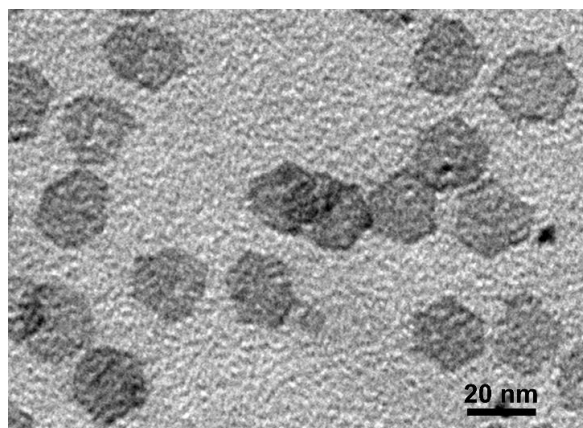

**Supplementary Fig. 1. TEM characterization.** TEM image of Pd nanosheets. Experiments were repeated three times independently with similar results.

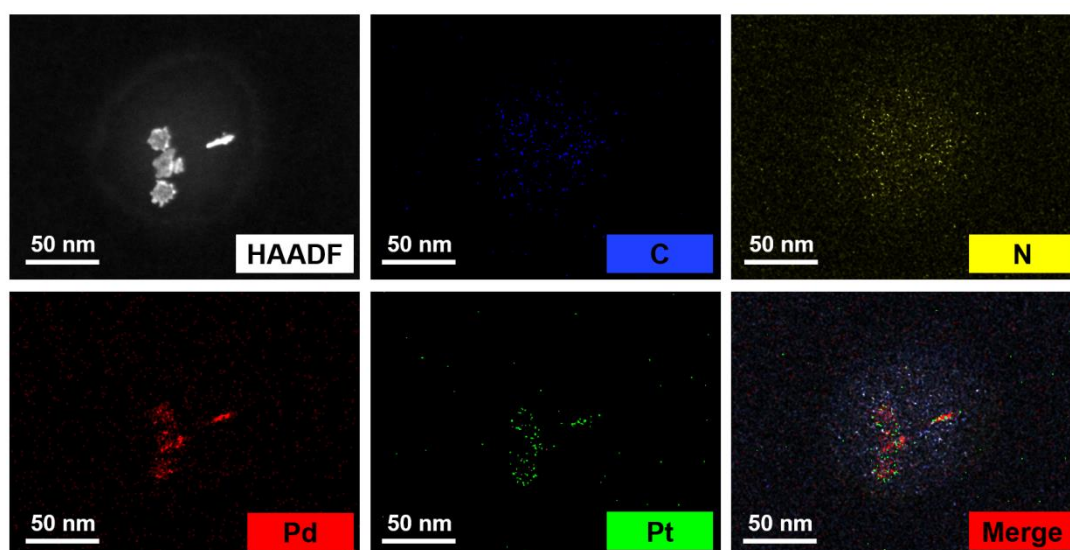

**Supplementary Fig. 2. Elemental characterization.** Elemental mapping of EV-Pd-Pt nanoparticles. Experiments were repeated three times independently with similar results.

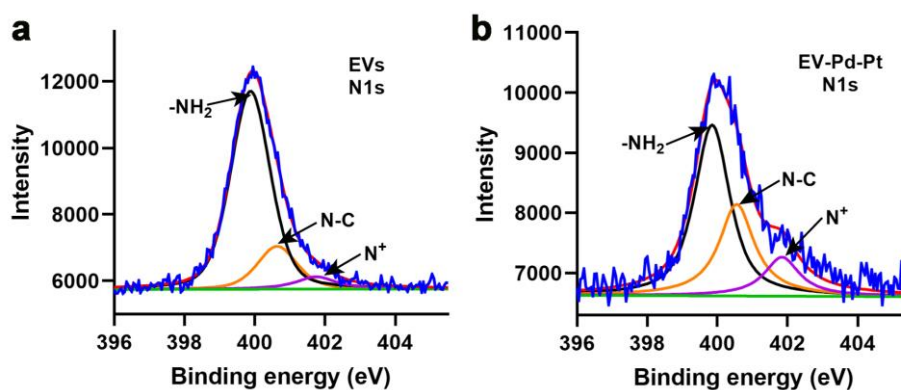

**Supplementary Fig. 3. Characterization of chemical bonding by XPS.** High-resolution X-ray photoelectron spectroscopy spectra of N1s in (a) EVs and (b) EV-Pd-Pt. Source data are provided as a Source Data file.

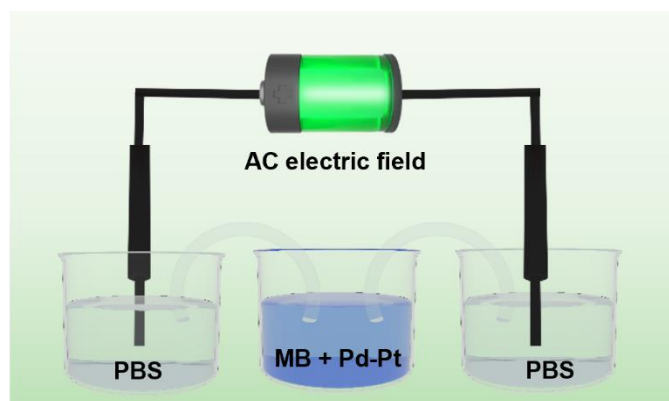

**Supplementary Fig. 4. Schematic diagram of the double salt bridge system.** Schematic illustration of the equipment for electro-driven catalytic experiment.

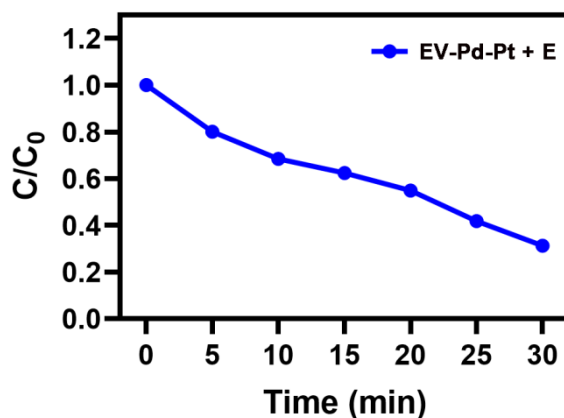

**Supplementary Fig. 5. Characterization of MB degradation.** Degradation rate of MB in the presence of EV-Pd-Pt (Pd-Pt concentration: 50  $\mu\text{g/mL}$ ) under electric field. Source data are provided as a Source Data file.

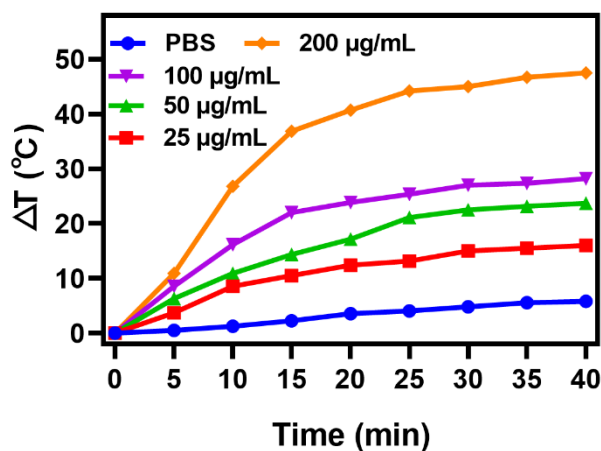

**Supplementary Fig. 6. Photothermal property of Pd-Pt nanosheets.** Temperature evolution curves of Pd-Pt solutions with different concentrations under 980 nm laser irradiation (0.5 W/cm). Source data are provided as a Source Data file.

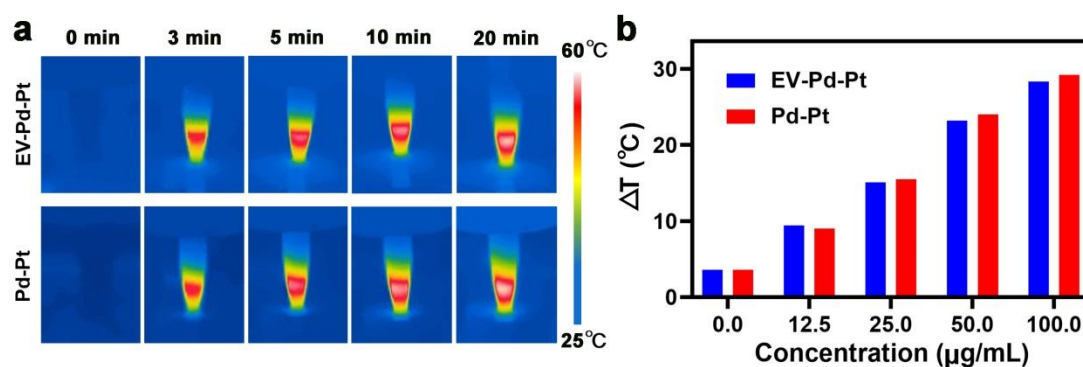

**Supplementary Fig. 7. Photothermal property of EV-Pd-Pt.** **a**, Infrared thermal images of EV-Pd-Pt and Pd-Pt (Pd-Pt concentration: 100 µg/mL) under 980 nm laser irradiation (0.5 W/cm<sup>2</sup>) for 20 min. **b**, Temperature variations of EV-Pd-Pt and Pd-Pt solutions at different Pd-Pt concentrations under 980 nm laser irradiation. Source data are provided as a Source Data file.

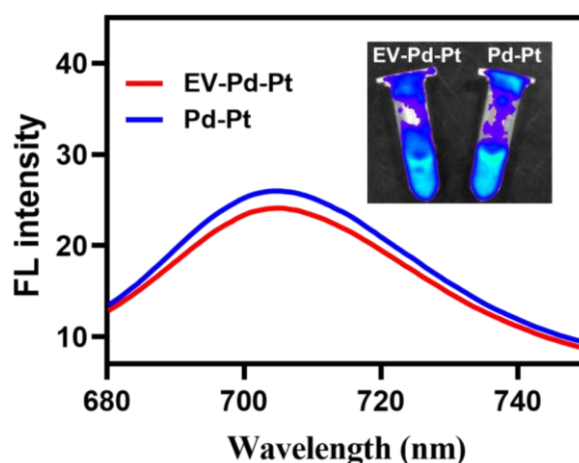

**Supplementary Fig. 8. Characterization of fluorescently labeled nanoparticles.** Fluorescence emission spectra of Cy5.5-labeled Pd-Pt and EV-Pd-Pt with excitation at 640 nm. Source data are provided as a Source Data file.

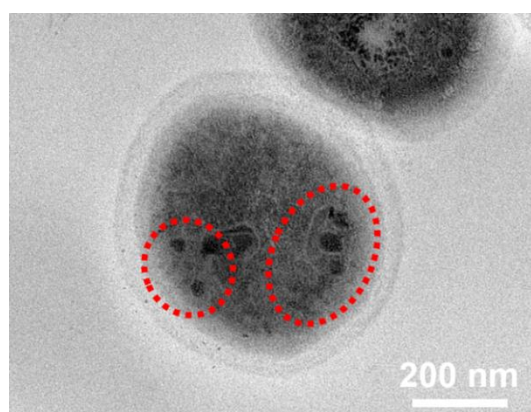

**Supplementary Fig. 9. TEM characterization of the bacterial section.** TEM images of an ultrathin section of *S. aureus* incubated with EV-Pd-Pt for 0.5 h. Experiments were repeated three times independently with similar results.

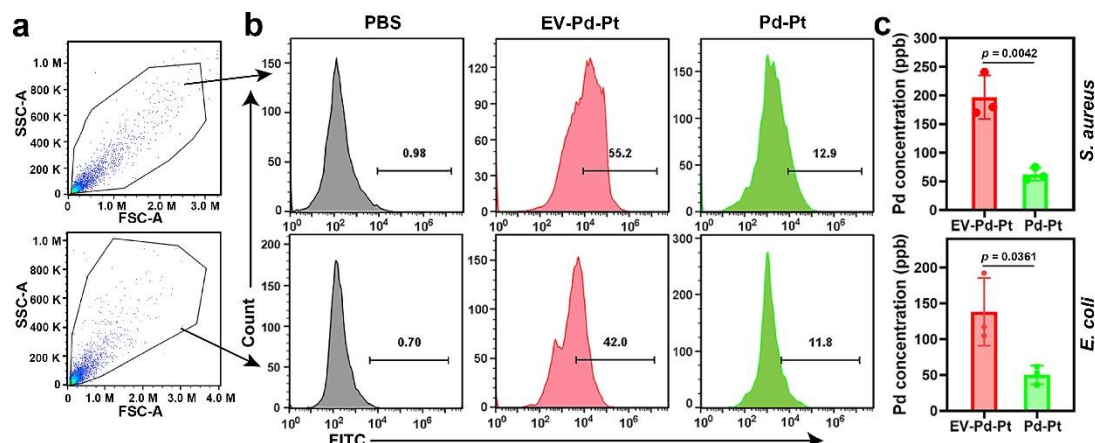

**Supplementary Fig. 10. Uptake of different nanoparticles by bacteria analyzed by flow cytometry and ICP-MS.** The gating strategy (a) and the flow cytometric analysis (b) of bacteria incubated with EV-Pd-Pt and Pd-Pt labeled by fluorescein-5-isothiocyanate (FITC) for 30 min, respectively. **c**, Quantification analysis of EV-Pd-Pt and Pd-Pt taken up by *S. aureus* and *E. coli* determined by ICP-MS. Data are presented as mean values  $\pm$  SD ( $n = 3$  independent samples). Statistical significance was calculated by two-tailed Student's *t*-test. Source data are provided as a Source Data file.

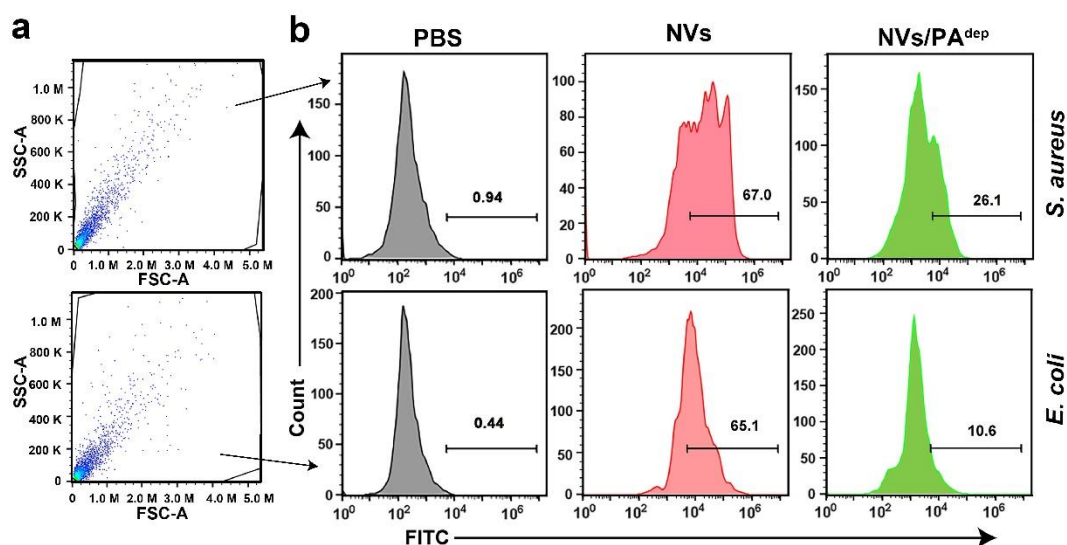

**Supplementary Fig. 11. Uptake of EV-Pd-Pt by different nano-sized vesicles analyzed by flow cytometry.** The gating strategy (a) and the flow cytometric analysis (b) of bacteria incubated with NVs assembled from total lipids and PA-depleted lipids, respectively.

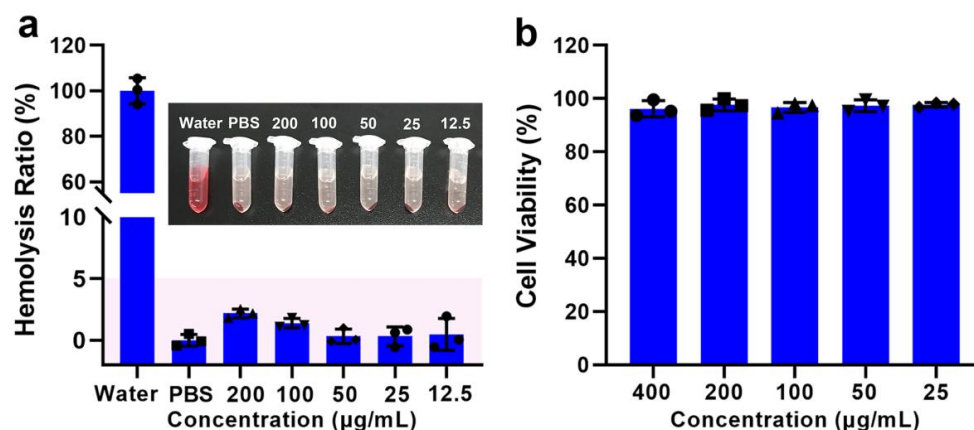

**Supplementary Fig. 12. Biocompatibility of EV-Pd-Pt nanoparticles in vitro.** **a**, Relative hemolysis ratio of EV-Pd-Pt solutions with different concentrations. **b**, Cell viability of L929 cells after 24 h incubation with EV-Pd-Pt solutions with different concentrations. Data are presented as mean values  $\pm$  SD ( $n = 3$  independent samples). Source data are provided as a Source Data file.

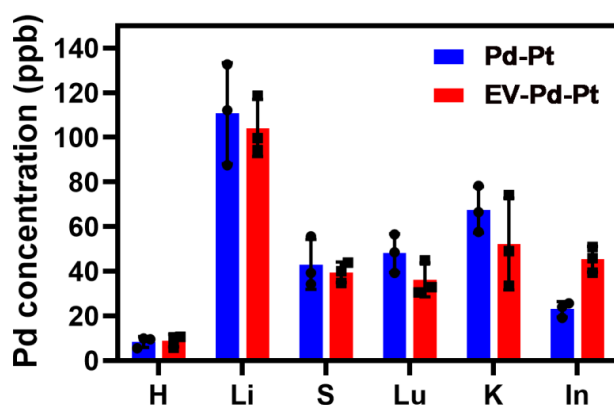

**Supplementary Fig. 13. Quantitative analysis of nanoparticles in major organs.** Biodistribution of EV-Pd-Pt and Pd-Pt evaluated by Pd in different organs at 8 h post-injection determined by ICP-MS. Data are presented as mean values  $\pm$  SD ( $n = 3$  independent samples). Source data are provided as a Source Data file.

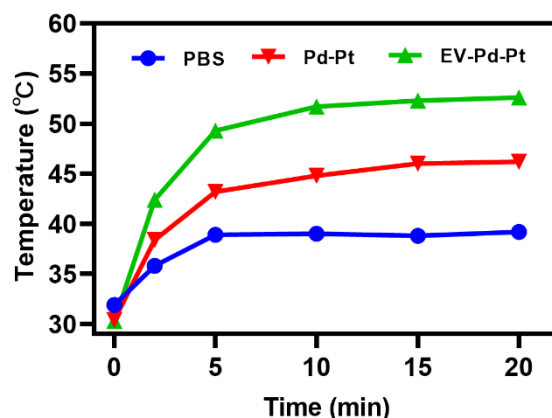

**Supplementary Fig. 14. Photothermal effect of nanoparticles in vivo.** Corresponding temperature profiles of infection sites after intravenous injection with PBS, Pd-Pt, and EV-Pd-Pt, respectively as a function of irradiation time (980 nm, 0.5 W/cm<sup>2</sup>). Source data are provided as a Source Data file.

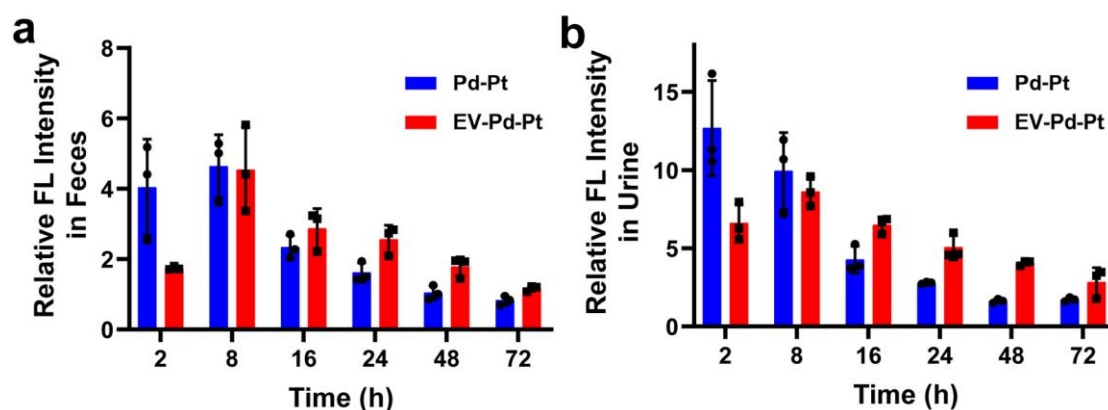

**Supplementary Fig. 15. Evaluation of in vivo excretion by fluorescence signals.** Quantitative analysis the fluorescence intensity of feces (**a**) and urine (**b**) at different time points after intravenous injection of Pd-Pt or EV-Pd-Pt. Data are presented as mean values  $\pm$  SD ( $n = 3$  independent samples). Source data are provided as a Source Data file.

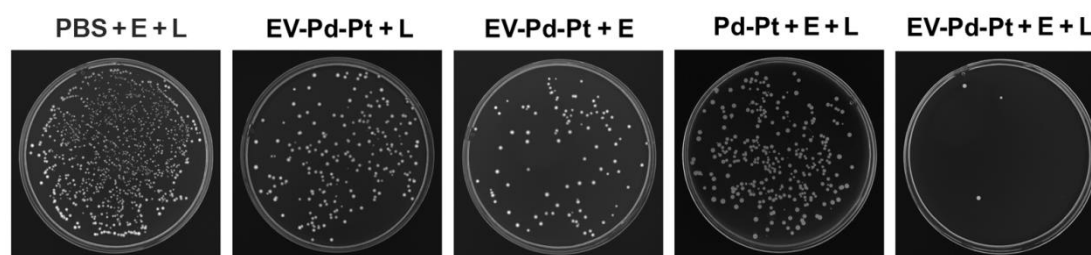

**Supplementary Fig. 16. In vivo antibacterial effect evaluated by plate counting method.** Photographs of bacterial colonies from infected tissues of different treatment groups after 5 days of treatment.

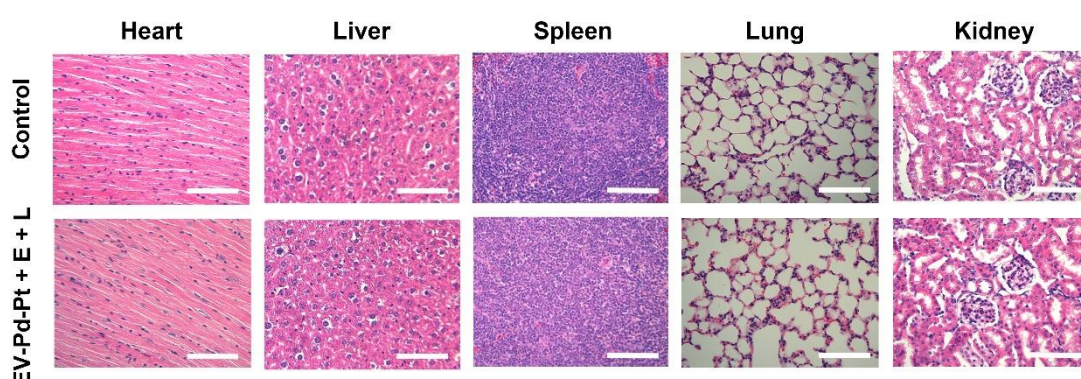

**Supplementary Fig. 17. In vivo biocompatibility evaluated by histological analysis.** Corresponding H&E staining of major organs including heart, liver, spleen, lungs, and kidneys in EV-Pd-Pt + E + L group after 5 days of treatment. Healthy mice served as controls. Scale bar: 100  $\mu$ m. Experiments were repeated three times independently with similar results.

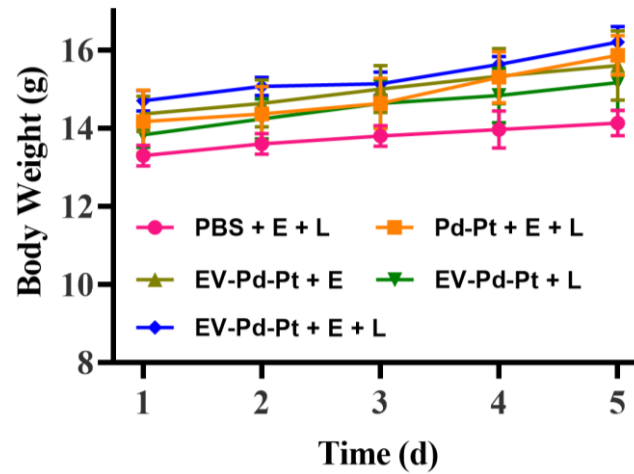

**Supplementary Fig. 18. Evaluation of changes in mouse body weight.** Body weight changes of mice in different groups after the treatments. Data are presented as mean values  $\pm$  SD ( $n = 3$  independent samples). Source data are provided as a Source Data file.

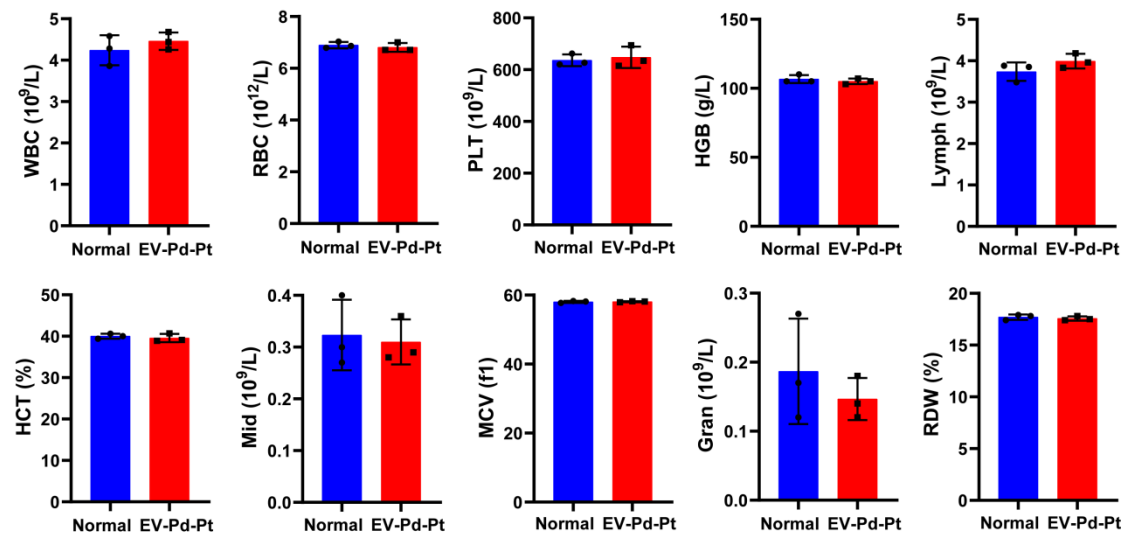

**Supplementary Fig. 19. Blood biochemical analysis.** Some blood routine and biochemical indexes of mice in EV-Pd-Pt + E + L group after 5 days of treatment. Data are presented as mean values  $\pm$  SD ( $n = 3$  independent samples). Source data are provided as a Source Data file.
